# Supplementary material for: RNALigands: a database and web server for RNA–ligand interactions
Source: PubMed Central journal article supplement — RNA. 2022 Feb;28(2):115–22. doi: 10.1261/rna.078889.121 (PMC8906548; doi:10.1261/rna.078889.121), 2022-02
Supplement: supp_078889.121_Supplemental_Fig_S3.pdf [file supp_078889.121_Supplemental_Fig_S3.pdf]

## Motifs in 5'UTR of SARS-CoV-2 genome

### 5'UTR of SARS-CoV-2 genome

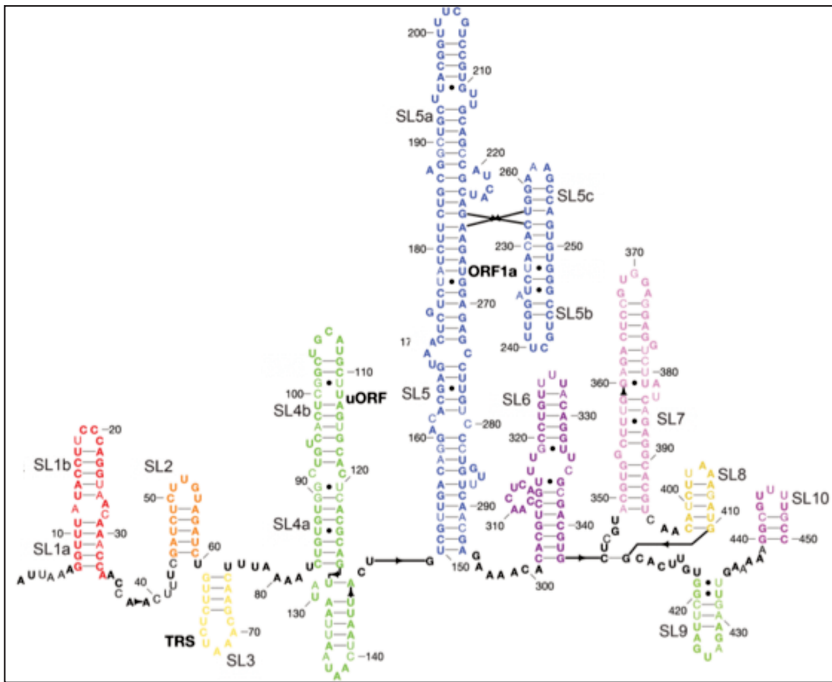

Motif  
Extraction

SL1: H1 (U,A) UCCC  
I1 (U,A) A (U,A) AC

SL2: H1 (U,A) CUUGU

SL3: H1 (C,G) UC UAAAC

SL4: H1 (C,G) UGCAU  
H2 (A,U) AUAAC  
B1 (G,C) U (C,G)  
B2 (U,A) AU (A,U)  
I1 (G,U) C (U,A) C  
I2 (U,A) C (G,U) U

SL5: H1 (G,C) UUUCGU  
H2 (G,C) UUUCGU  
H3 (C,G) GAAA  
B1 (C,G) G (U,A)  
B2 (U,G) A (G,C)  
B3 (G,C) GUU (U,A)  
I1 (G,C) AC (A,U) C  
I2 (G,C) UAA (C,G) C  
I3 (G,C) CA (G,C) GAUCAU  
I4 (C,G) U (U,G) UU  
M1 (U,A) (C,G) (C,G) (A,U) (A,U)

SL6: H1 (U,A) UUU  
I1 (U,G) ACAACUCUU (G,U) UC

SL7: H1 (C,G) GUGGA  
B1 (G,C) G (U,A)  
B2 (U,G) AU (C,G)  
I1 (G,C) G (C,G) G

SL8: H1 (U,A) UAA

SL9: H1 (U,A) AGUAG

SL10: H1 (C,G) GUUUU

Motif Alignment

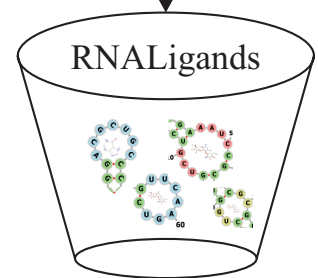

Output

|      | Query Motif           | Target Motif      | Ligand |
|------|-----------------------|-------------------|--------|
| SL1: | I1 (U,A) A (U,A) AC   | (G,C) A (U,A) AC  | FMN    |
| SL4: | I1: (G,U) C (U,A) C   | (C,C) C (U,G) C   | G4P    |
|      | B1: (G,C) U (C,G)     | (C,G) U (C,G)     | GLY    |
|      | I2: (U,A) C (G,U) U   | (G,C) U (C,G) U   | GE3    |
|      | B2: (U,A) AU (A,U)    | (C,G) UU (G,C)    | GND    |
| SL5: | I1: (G,C) AC (A,U) C  | (G,C) A (U,A) AC  | FMN    |
|      | I2: (G,C) UAA (C,G) C | (C,G) U (A,G) AGC | G4P    |
|      | B1: (C,G) G (U,A)     | (C,G) A (C,G)     | TOA    |
|      | I4: (C,G) U (U,G) UU  | (C,G) AA (C,G) U  | SAM    |
|      | H1: (G,C) UUUCGU      | (G,C) UUUCUU      | HPA    |
|      | B2: (U,G) A (G,C)     | (C,G) A (G,C)     | NMY    |
|      | H2: (G,C) UUUCGU      | (G,C) UUUCUU      | HPA    |
|      | H3: (C,G) GAAA        | (G,C) GAAA        | AMZ    |
|      | B3: (G,C) GUU (U,A)   | (G,C) CUU (G,C)   | RIO    |
| SL6: | H1: (U,A) UUU         | (U,A) UGA         | HRP    |
| SL7: | I1: (G,C) G (C,G) G   | (G,C) U (C,G) U   | GE3    |
|      | B1: (G,C) G (U,A)     | (G,C) G (U,G)     | FFO    |
|      | B2: (U,G) AU (C,G)    | (C,G) GU (C,G)    | 2BA    |
| SL8: | H1: (U,A) UAA         | (U,A) UGA         | HRP    |
