# Supplementary figures and images for: RNALigands: a database and web server for RNA–ligand interactions
Source: PubMed Central journal article supplement — RNA. 2022 Feb;28(2):115–22. doi: 10.1261/rna.078889.121 (PMC8906548; doi:10.1261/rna.078889.121), 2022-02

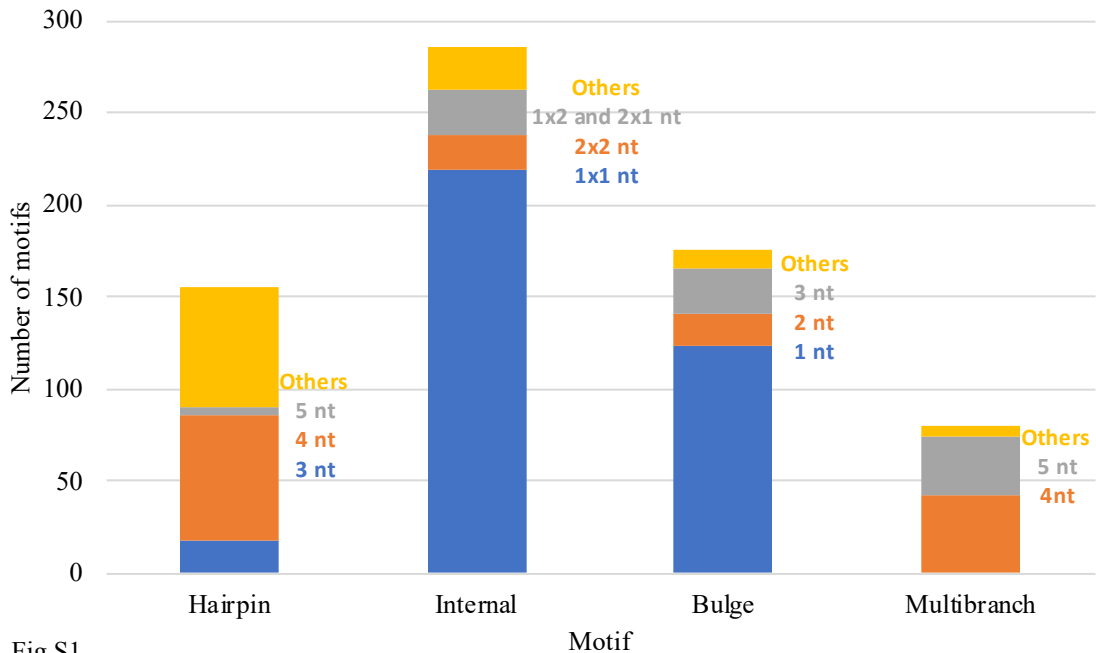

Fig S1

Supplement: supp_078889.121_Supplemental_Fig_S1.pdf [file supp_078889.121_Supplemental_Fig_S1.pdf]

(1)

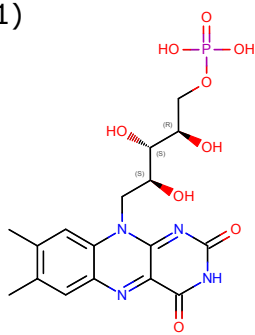

(2)

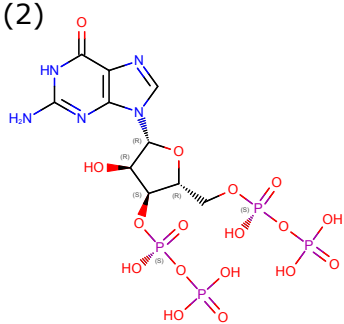

(3)

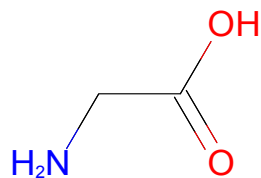

(4)

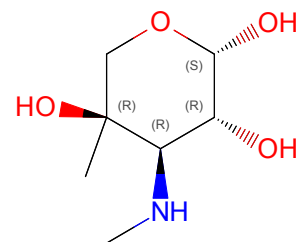

(5)

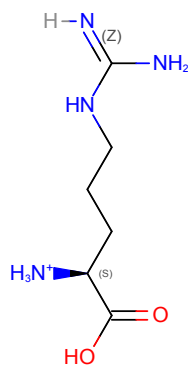

(6)

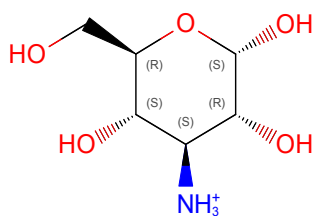

(7)

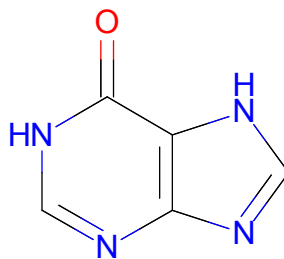

(8)

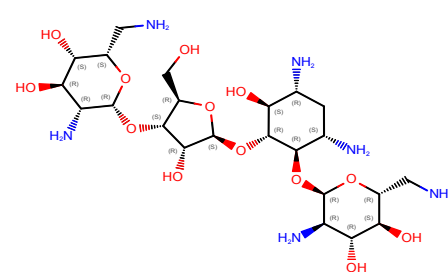

(9)

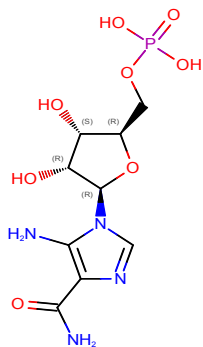

(10)

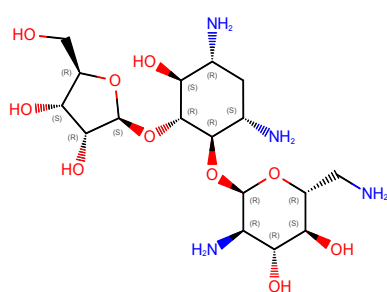

(11)

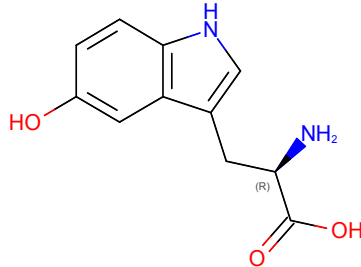

(12)

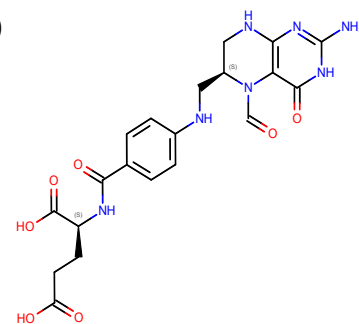

(13)

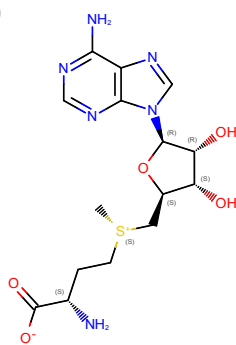

(14)

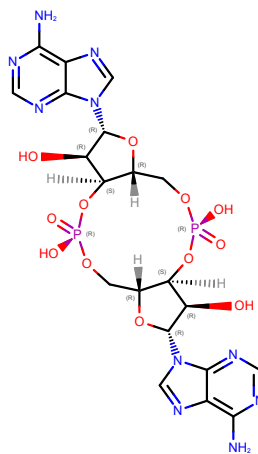

Supplement: supp_078889.121_Supplemental_Fig_S2.pdf [file supp_078889.121_Supplemental_Fig_S2.pdf]
